# Supplementary material for: Trajectory planning for manipulator grasping with obstacle avoidance and visual occlusion in a complex environment
Source: Copernicus journal article supplement (doi:10.5194/ms-16-445-2025), 2025-09-10
Supplement: Supplementary file 1 [file ms-16-445-2025-supplement.zip]

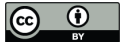

## *Supplement of*

# **Trajectory planning for manipulator grasping with obstacle avoidance and visual occlusion in a complex environment**

**Jue Wang et al.**

*Correspondence to:* Wei Wang (wangw@zstu.edu.cn)

- ms-16-445-2025-supplement-title-page.pdf
- ms-2024-253-supplement
  - Scene 3
    - \* Trajectory Planning + Visual Recognition.mp4
    - \* Trajectory Planning.mp4
    - \* Visual Identity.mp4

The copyright of individual parts of the supplement might differ from the article licence.
